# Supplementary material
Source: PubMed Central journal article supplement (PMC6485678)
Supplement: NIHMS82543-supplement-Appendix.pdf [file NIHMS82543-supplement-Appendix.pdf]

# Appendix 1 The EpAID trial nurse self-completion diary version 1.4

Screening ID:

Nurse TIN no:

|   |  |  |  |  |  |
|---|--|--|--|--|--|
| w |  |  |  |  |  |
|   |  |  |  |  |  |

## EpAID Epilepsy Nurse Self-Completion Diary Instructions

**Thank you for agreeing to complete this diary. Your help is much appreciated.**

If you have any problems with any aspect of the data collection then please contact:

The diary will collect data for one month at a time and is to be returned to the university team at the end of each month in the freepost envelope provided or electronically to:

You will receive an adequate number of diaries during your training session.

### SHEET 1 AND SUBSEQUENT SHEETS

Please use sheet one and continuation sheets to give details of each episode of care that you provide and the activity that you undertook during each intervention with that patient.

To minimise problems with recall, please complete the diary on a daily basis. If time permits and it does not compromise patient care, then please complete the individual patient entries after each consultation.

**Date and time-** please give details so that we can establish how often and for how long you saw the patient.

**Location -** Please specify where you saw the patient on that occasion (e.g. Home, Clinic, GP Surgery, Telephone, or Other (please specify this location)).

**Reasons For intervention –** From the words provided, please describe the intervention **using the corresponding numbers**, selecting all that apply. **Please enter the main reason for the intervention in the first box and any other reasons in the second box.**

**Details of care given –** Please list ALL the activities that you have completed during the consultation, **using the numbers** that correspond to the list of words. We want to capture all the activities that you undertake with your patients however minor they might seem. **Please enter the main reason for the intervention in the first box and any other reasons in the second box.**

Screening ID:

|   |  |  |  |  |  |
|---|--|--|--|--|--|
| W |  |  |  |  |  |
|---|--|--|--|--|--|

Nurse TIN no:

### Sheet One Activity Details

| Date of Intervention | Start time of Intervention | Location of intervention<br>(Home, Clinic, GP Surgery, Telephone, Other) | Reason for Intervention (Please use numbers)<br>(1. Assessment; 2. Counselling;<br>3. Education; 4. Health Facilitation;<br>5. Management Planning;<br>6. Monitoring Epilepsy; 7. Monitoring Health/Behaviour; 8. Monitoring Treatment;<br>9. Responding to Urgent Health or Behavioural Concern; 10. Other) |                 | Details of care given (Please use numbers)<br>(1. Education of Family Carer; 2. Education of Paid Staff; 3. Education of Patient;<br>4. Health Facilitation; 5. Investigation Request; 6. Management Planning;<br>7. Medication Issues; 8. Prescribing;<br>9. Review and Monitoring of Medication;<br>10. Other) |                 | End time of Intervention |
|----------------------|----------------------------|--------------------------------------------------------------------------|--------------------------------------------------------------------------------------------------------------------------------------------------------------------------------------------------------------------------------------------------------------------------------------------------------------|-----------------|------------------------------------------------------------------------------------------------------------------------------------------------------------------------------------------------------------------------------------------------------------------------------------------------------------------|-----------------|--------------------------|
|                      |                            |                                                                          | Main Reason                                                                                                                                                                                                                                                                                                  | Other Reason(s) | Main Reason                                                                                                                                                                                                                                                                                                      | Other Reason(s) |                          |
|                      |                            |                                                                          |                                                                                                                                                                                                                                                                                                              |                 |                                                                                                                                                                                                                                                                                                                  |                 |                          |
|                      |                            |                                                                          |                                                                                                                                                                                                                                                                                                              |                 |                                                                                                                                                                                                                                                                                                                  |                 |                          |
|                      |                            |                                                                          |                                                                                                                                                                                                                                                                                                              |                 |                                                                                                                                                                                                                                                                                                                  |                 |                          |
|                      |                            |                                                                          |                                                                                                                                                                                                                                                                                                              |                 |                                                                                                                                                                                                                                                                                                                  |                 |                          |





4. In the last four weeks, when the participant had seizures, how often did he/she fall to the ground?
- |                                                                                               |       |   |   |
|-----------------------------------------------------------------------------------------------|-------|---|---|
| Always                                                                                        | ..... | 1 |   |
| Usually                                                                                       | ..... | 2 |   |
| Sometimes/rarely                                                                              | ..... | 3 |   |
| Never                                                                                         | ..... | 4 |   |
| <b>Does not apply</b> - participant does not stand independently/participant wheelchair bound | ..... | 5 |   |
| Can't say                                                                                     | ..... | 6 | 7 |
- 
5. In the last four weeks, was the participant ever confused, disorientated or non-responsive after seizures?
- |                       |       |   |   |
|-----------------------|-------|---|---|
| Yes, always           | ..... | 1 |   |
| Yes, often            | ..... | 2 |   |
| Yes, sometimes/rarely | ..... | 3 |   |
| No, never             | ..... | 4 |   |
| Can't say             | ..... | 5 | 8 |
- 
6. In the last four weeks, **if** the participant was confused, disorientated or non-responsive after seizures, how long did this usually last?
- |                                                                |       |   |   |
|----------------------------------------------------------------|-------|---|---|
| Usually lasted less than 1 minute                              | ..... | 1 |   |
| Usually lasted for between 1-5 minutes                         | ..... | 2 |   |
| Usually lasted for between 6 minutes - 1 hour                  | ..... | 3 |   |
| Usually lasted for more than 1 hour                            | ..... | 4 |   |
| Participant never seemed confused/disorientated/non-responsive | ..... | 5 |   |
| Can't say                                                      | ..... | 6 | 9 |
- 
7. How often was the participant distressed after seizures in the last four weeks?
- |                  |       |   |    |
|------------------|-------|---|----|
| Always           | ..... | 1 |    |
| Usually.         | ..... | 2 |    |
| Sometimes/rarely | ..... | 3 |    |
| Never            | ..... | 4 |    |
| Can't say        | ..... | 5 | 10 |
- 
8. In the last four weeks, how often did the participant wet him/herself during seizures?
- |                                                   |       |   |    |
|---------------------------------------------------|-------|---|----|
| Always                                            | ..... | 1 |    |
| Usually                                           | ..... | 2 |    |
| Sometimes/rarely                                  | ..... | 3 |    |
| Never                                             | ..... | 4 |    |
| Can't say – participant has no control of bladder | ..... | 5 | 11 |

---

9. In the last four weeks, how often did the participant soil him/herself during seizures?

|                                                  |       |   |    |
|--------------------------------------------------|-------|---|----|
| Always                                           | ..... | 1 |    |
| Usually                                          | ..... | 2 |    |
| Sometimes/rarely                                 | ..... | 3 |    |
| Never                                            | ..... | 4 |    |
| Can't say – participant has no control of bowels | ..... | 5 | 12 |

---

10. In the last four weeks, did the participant suffer any injury to the mouth, cheek or tongue during a seizure?

|                  |       |   |    |
|------------------|-------|---|----|
| Always           | ..... | 1 |    |
| Usually          | ..... | 2 |    |
| Sometimes/rarely | ..... | 3 |    |
| Never            | ..... | 4 |    |
| Can't say        | ..... | 5 | 13 |

---

11. In the last four weeks, did the participant suffer any injury other than to the mouth, cheek or tongue during a seizure?

|                  |       |   |    |
|------------------|-------|---|----|
| Always           | ..... | 1 |    |
| Usually          | ..... | 2 |    |
| Sometimes/rarely | ..... | 3 |    |
| Never            | ..... | 4 |    |
| Can't say        | ..... | 5 | 14 |

---

12. How upset was the participant by the injury/injuries he/she suffered during seizures in the last four weeks?
- |                                     |       |   |    |
|-------------------------------------|-------|---|----|
| Very upset                          | ..... | 1 |    |
| Somewhat upset                      | ..... | 2 |    |
| Not very upset                      | ..... | 3 |    |
| Not at all upset                    | ..... | 4 |    |
| <b>Does not apply</b> - no injuries | ..... | 5 |    |
| Can't say                           | ..... | 6 | 15 |
- 

13. In the last four weeks, when the participant recovered from his/her seizures, how often did he/she appear sleepy or subdued?
- |                  |       |   |    |
|------------------|-------|---|----|
| Always           | ..... | 1 |    |
| Usually          | ..... | 2 |    |
| Sometimes/rarely | ..... | 3 |    |
| Never            | ..... | 4 |    |
| Can't say        | ..... | 5 | 16 |
- 

14. In the last four weeks, when the participant had seizures, how quickly could he/she usually return to what he/she was doing?
- |                               |       |   |    |
|-------------------------------|-------|---|----|
| In less than 1 minute         | ..... | 1 |    |
| In between 1-5 minutes        | ..... | 2 |    |
| In between 6 minutes - 1 hour | ..... | 3 |    |
| In over 1 hour                | ..... | 4 |    |
| Can't say                     | ..... | 5 | 17 |

**Now some more detailed questions about any injuries the participant experienced in the last four weeks, as a result of his/her seizures.**

15. In the past four weeks, how many times did the participant injure him/herself during a seizure?
- |                                            |       |   |                                            |
|--------------------------------------------|-------|---|--------------------------------------------|
| Not at all                                 | ..... | 0 | <input type="button" value="Go to Q 17"/>  |
| Number of times ( <i>please write in</i> ) | ..... |   | <input type="button" value="Answer Q 16"/> |
- 18
- 

16. Did he/she suffer any of the following injuries as a result of having a seizure in the last four weeks?
- a) An injury to his/her head which required assessment and/or treatment at hospital?
- |     |       |   |    |
|-----|-------|---|----|
| Yes | ..... | 1 |    |
| No  | ..... | 2 | 19 |

- b) An injury to his/her teeth or mouth which required dental or medical treatment?
- |     |       |   |    |
|-----|-------|---|----|
| Yes | ..... | 1 |    |
| No  | ..... | 2 | 20 |
- c) A fracture/broken bone?
- |     |       |   |    |
|-----|-------|---|----|
| Yes | ..... | 1 |    |
| No  | ..... | 2 | 21 |
- d) Bruising or friction burns to any part of the body?
- |     |       |   |    |
|-----|-------|---|----|
| Yes | ..... | 1 |    |
| No  | ..... | 2 | 22 |
- e) Cuts or grazes to any part of the body?
- |     |       |   |    |
|-----|-------|---|----|
| Yes | ..... | 1 |    |
| No  | ..... | 2 | 23 |
- f) Any other injury? (*please tell us what*):
- |     |       |   |    |
|-----|-------|---|----|
| Yes | ..... | 1 |    |
| No  | ..... | 2 | 24 |
- g) Please list other injuries:
- 1.....
- 2.....

**Now a few questions about the drugs the participant takes for epilepsy**

17. In the last four weeks, how well do you think the participant's seizures have been controlled by the drugs he/she is taking?

|                          |       |   |    |
|--------------------------|-------|---|----|
| Very well controlled     | ..... | 1 |    |
| Fairly well controlled   | ..... | 2 |    |
| Not very well controlled | ..... | 3 |    |
| Not controlled at all    | ..... | 4 |    |
| Can't say                | ..... | 5 | 25 |



18. Below is a list of problems people sometimes have with the drugs they take for their epilepsy. During the last four weeks, has the participant had any of the problems listed **which you think may have been caused by the drugs** he/she takes for epilepsy?

For each of the things listed, if it has always been a problem in the last four weeks, ring 1; if it has often been a problem, ring 2; and so on. Please answer every item.

|                                                                                 | Always a<br>problem | Often a<br>problem | Sometimes/<br>rarely a<br>problem | Never a<br>problem | Can't<br>say |    |
|---------------------------------------------------------------------------------|---------------------|--------------------|-----------------------------------|--------------------|--------------|----|
| A. Unsteadiness/dizziness.....                                                  | 1.....              | 2.....             | 3.....                            | 4.....             | 5            | 26 |
| B. Tiredness.....                                                               | 1.....              | 2.....             | 3.....                            | 4.....             | 5            |    |
| C. Restlessness.....                                                            | 1.....              | 2.....             | 3.....                            | 4.....             | 5            |    |
| D. Hyperactivity.....                                                           | 1.....              | 2.....             | 3.....                            | 4.....             | 5            |    |
| E. Nervousness.....                                                             | 1.....              | 2.....             | 3.....                            | 4.....             | 5            |    |
| F. Headache.....                                                                | 1.....              | 2.....             | 3.....                            | 4.....             | 5            |    |
| G. Problems with skin, e.g. rash.....                                           | 1.....              | 2.....             | 3.....                            | 4.....             | 5            |    |
| H. Disturbed vision.....                                                        | 1.....              | 2.....             | 3.....                            | 4.....             | 5            |    |
| I. Upset stomach/nausea.....                                                    | 1.....              | 2.....             | 3.....                            | 4.....             | 5            |    |
| J. Difficulty paying attention.....                                             | 1.....              | 2.....             | 3.....                            | 4.....             | 5            |    |
| K. Trouble with mouth or gums.....                                              | 1.....              | 2.....             | 3.....                            | 4.....             | 5            |    |
| L. Shaky hands/tremor.....                                                      | 1.....              | 2.....             | 3.....                            | 4.....             | 5            |    |
| M. Weight gain.....                                                             | 1.....              | 2.....             | 3.....                            | 4.....             | 5            |    |
| N. Weight loss.....                                                             | 1.....              | 2.....             | 3.....                            | 4.....             | 5            |    |
| O. Sleepiness/drowsiness.....                                                   | 1.....              | 2.....             | 3.....                            | 4.....             | 5            |    |
| P. Memory problems.....                                                         | 1.....              | 2.....             | 3.....                            | 4.....             | 5            |    |
| Q. Disturbed sleep.....                                                         | 1.....              | 2.....             | 3.....                            | 4.....             | 5            |    |
| R. Loss of appetite.....                                                        | 1.....              | 2.....             | 3.....                            | 4.....             | 5            |    |
| S. Behaviour problems (e.g. temper<br>tantrums, irritability or agitation)..... | 1.....              | 2.....             | 3.....                            | 4.....             | 5            | 44 |

18T. Any other problems (please list in the spaces below):

|        |        |        |        |        |    |
|--------|--------|--------|--------|--------|----|
| 1..... | 1..... | 2..... | 3..... | 4..... |    |
| 2..... | 1..... | 2..... | 3..... | 4..... | 46 |

**Now some questions about how the participant has been generally. Please think about how the participant has been over the last four weeks, compared to how he/she is normally.**

19. How aware has the participant been of his/her surroundings/things going on around him/her, in the last four weeks?

Very aware ..... 1  
Fairly aware ..... 2

|                  |       |   |    |
|------------------|-------|---|----|
| Not very aware   | ..... | 3 |    |
| Not at all aware | ..... | 4 |    |
| Can't say        | ..... | 5 | 47 |

---

20. How often, in the last four weeks, did the participant have problems sleeping (either difficulty falling asleep, waking during the night, or waking early)?

|                            |       |   |    |
|----------------------------|-------|---|----|
| Always a problem           | ..... | 1 |    |
| Often a problem            | ..... | 2 |    |
| Sometimes/rarely a problem | ..... | 3 |    |
| Never a problem            | ..... | 4 |    |
| Can't say                  | ..... | 5 | 48 |

---

21. How often was the participant's appetite a problem - either eating too much or too little?

|                            |       |   |    |
|----------------------------|-------|---|----|
| Always a problem           | ..... | 1 |    |
| Often a problem            | ..... | 2 |    |
| Sometimes/rarely a problem | ..... | 3 |    |
| Never a problem            | ..... | 4 |    |
| Can't say                  | ..... | 5 | 49 |

---

22. In the last four weeks, how good overall has the participant's bladder control been?

|                                                                  |       |   |    |
|------------------------------------------------------------------|-------|---|----|
| Very good                                                        | ..... | 1 |    |
| Good                                                             | ..... | 2 |    |
| Poor                                                             | ..... | 3 |    |
| Very poor                                                        | ..... | 4 |    |
| <b>Does not apply</b> - does not have control of his/her bladder | ..... | 5 |    |
| Can't say                                                        | ..... | 6 | 50 |

---

23. In the last four weeks, how good overall has the participant's bowel control been?

|                                                                 |       |   |    |
|-----------------------------------------------------------------|-------|---|----|
| Very good                                                       | ..... | 1 |    |
| Good                                                            | ..... | 2 |    |
| Poor                                                            | ..... | 3 |    |
| Very poor                                                       | ..... | 4 |    |
| <b>Does not apply</b> - does not have control of his/her bowels | ..... | 5 |    |
| Can't say                                                       | ..... | 6 | 51 |

---

24. In the last four weeks, how well has the participant been able to let you know what he/she wants?

|                 |       |   |    |
|-----------------|-------|---|----|
| Very well       | ..... | 1 |    |
| Fairly well     | ..... | 2 |    |
| Not very well   | ..... | 3 |    |
| Not at all well | ..... | 4 |    |
| Can't say       | ..... | 5 | 52 |

---

25. In the last four weeks, how well has he/she been able to understand what you tell him/her?

|                 |       |   |    |
|-----------------|-------|---|----|
| Very well       | ..... | 1 |    |
| Fairly well     | ..... | 2 |    |
| Not very well   | ..... | 3 |    |
| Not at all well | ..... | 4 |    |
| Can't say       | ..... | 5 | 53 |

---

26. In the last four weeks, how well has the participant been able to pay attention to his/her favourite activities?

|                 |       |   |    |
|-----------------|-------|---|----|
| Very well       | ..... | 1 |    |
| Fairly well     | ..... | 2 |    |
| Not very well   | ..... | 3 |    |
| Not at all well | ..... | 4 |    |
| Can't say       | ..... | 5 | 54 |

- 
27. How often in the last four weeks has the participant been prevented from taking part in his/her normal activities (e.g. seeing friends and relatives) by his/her seizures/epilepsy?

|                  |       |   |
|------------------|-------|---|
| Always           | ..... | 1 |
| Often            | ..... | 2 |
| Sometimes/rarely | ..... | 3 |
| Never            | ..... | 4 |
| Can't say        | ..... | 5 |

55

**Now some questions about the participant's mood in the last four weeks**

28. Here is a list of words that carers have used to describe patient's moods. In the last four weeks, has the participant appeared:-

|                             | Always | Often  | Sometimes/<br>rarely | Never  | Can't<br>say |    |
|-----------------------------|--------|--------|----------------------|--------|--------------|----|
| A. Happy.....               | 1..... | 2..... | 3.....               | 4..... | 5            | 56 |
| B. Aggressive.....          | 1..... | 2..... | 3.....               | 4..... | 5            |    |
| C. Calm.....                | 1..... | 2..... | 3.....               | 4..... | 5            |    |
| D. Irritable.....           | 1..... | 2..... | 3.....               | 4..... | 5            |    |
| E. Tearful.....             | 1..... | 2..... | 3.....               | 4..... | 5            |    |
| F. Friendly.....            | 1..... | 2..... | 3.....               | 4..... | 5            |    |
| G. Hyperactive.....         | 1..... | 2..... | 3.....               | 4..... | 5            |    |
| H. Relaxed.....             | 1..... | 2..... | 3.....               | 4..... | 5            |    |
| I. Sad.....                 | 1..... | 2..... | 3.....               | 4..... | 5            |    |
| J. Agitated.....            | 1..... | 2..... | 3.....               | 4..... | 5            |    |
| K. Cheerful.....            | 1..... | 2..... | 3.....               | 4..... | 5            |    |
| L. Restless.....            | 1..... | 2..... | 3.....               | 4..... | 5            |    |
| M. Tantrum-prone.....       | 1..... | 2..... | 3.....               | 4..... | 5            |    |
| N. Frustrated.....          | 1..... | 2..... | 3.....               | 4..... | 5            |    |
| O. Withdrawn.....           | 1..... | 2..... | 3.....               | 4..... | 5            |    |
| P. Cooperative/helpful..... | 1..... | 2..... | 3.....               | 4..... | 5            | 71 |



# Appendix 3 Safety procedures and adverse events

## Reporting processes

It was not expected that there would be any major negative effects on participants resulting from participating in the EpAID trial. No clinically indicated treatments were withheld in either arm of the trial. However, SAEs that could have been expected in association with participation in the trial included an increase in seizure frequency or severity, occurrence of uncontrolled seizures requiring paramedic support or hospital admission and emergence of AED-related adverse effects.

The PI at each cluster site was responsible for recording all SAEs and reporting them to the chief investigator, via the trial co-ordinator, on trial SAE forms. The chief investigator then reported all SAEs to the sponsor. Any SAEs classified as 'related' and 'unexpected' were to be reported to the main research ethics committee within 15 days of the chief investigator becoming aware of them.

## Adverse events

An adverse event was defined as any untoward medical occurrence in a participant involved in the trial. Adverse events occurring from time to time in patients participating in this trial in both the TAU arm and the intervention arm were generally not serious in nature and were not considered significant in terms of the safety assessment. They were not recorded unless considered serious, as defined in the following section.

## Serious adverse events

A SAE was defined as any untoward medical occurrence that:

- resulted in death
- was life-threatening
- required hospitalisation or prolongation of existing hospitalisation
- resulted in persistent or significant disability or incapacity
- consisted of a genetic abnormality or birth defect
- was otherwise considered medically significant by the investigator.

Serious adverse events that might have been expected in the EpAID trial participants were:

- increased seizure frequency or severity
- the occurrence of uncontrolled seizures requiring paramedic support or hospital admission
- the emergence of AED-related adverse effects
- any event that the treating clinician would expect in a patient with an ID and epilepsy.

For each SAE identified the likely cause, in the view of the local PI (either EpAID trial related or not EpAID trial related), and the outcome (recovered, recovered with sequelae, ongoing, unknown and death) were recorded along with the start date, the criteria for designation, expectedness and causality.

## Hospital admissions

In adults with an ID, regardless of whether or not they have epilepsy, there are several causes of hospital admission that are relatively common and would be expected and unrelated to participation in the trial. Admissions to hospital for these reasons were not reported as SAEs unless a participant's local clinical team considered that an admission primarily for one of the reasons on the list was nevertheless directly or indirectly associated with the participant's involvement in the trial. These causes of hospital admission are:

- constipation
- complications of diabetes mellitus
- respiratory infections
- asthma
- cellulitis
- dental infections
- kidney disease.

## Serious adverse events reported

The complete list of adverse events reported is provided in *Table 32*.

**TABLE 32** Complete list of SAEs reported

| Site | Person identification number | SAE                                                                                                            | Consequence     | Caused by EpAID trial | Outcome  |
|------|------------------------------|----------------------------------------------------------------------------------------------------------------|-----------------|-----------------------|----------|
| 01   | 1                            | Admitted for prolonged seizures                                                                                | Hospitalisation | No                    | Unknown  |
| 01   | 4                            | Admitted for prolonged seizures                                                                                | Hospitalisation | No                    | Unknown  |
| 01   | 12                           | Hospitalised for management of deep-vein thrombosis                                                            | Hospitalisation | No                    | Resolved |
| 01   | 12                           | Admitted following 2–3 weeks of poor eating and drinking                                                       | Hospitalisation | No                    | Unknown  |
| 01   | 19                           | Admitted for uncontrolled seizures secondary to poor food and fluid intake and medication compliance           | Hospitalisation | No                    | Unknown  |
| 02   | 2                            | Admitted for back pain and laboured breathing                                                                  | Hospitalisation | No                    | Resolved |
| 02   | 3                            | Admitted because of coughing and general lethargy alongside associated foul-smelling urine                     | Hospitalisation | No                    | Resolved |
| 02   | 3                            | Admitted following five seizures overnight                                                                     | Hospitalisation | No                    | Resolved |
| 02   | 4                            | Admitted because of increased seizure activity                                                                 | Hospitalisation | No                    | Resolved |
| 02   | 6                            | Percutaneous endoscopic gastrostomy tube had fallen out overnight. Admitted for re-siting. Discharged same day | Hospitalisation | No                    | Resolved |
| 02   | 10                           | Admitted to hospital with community-acquired pneumonia                                                         | Hospitalisation | No                    | Resolved |
| 02   | 10                           | Admitted to hospital following repeated seizures despite rescue medication                                     | Hospitalisation | No                    | Resolved |
| 02   | 14                           | Admitted for mental health breakdown                                                                           | Hospitalisation | No                    | Ongoing  |
| 02   | 21                           | Pneumonia and multiple organ failure                                                                           | Death           | No                    | Death    |
| 02   | 21                           | Constipation                                                                                                   | Hospitalisation | No                    | Resolved |



TABLE 32 Complete list of SAEs reported (continued)

| Site | Person identification number | SAE                                                                                                     | Consequence     | Caused by EpAID trial | Outcome  |
|------|------------------------------|---------------------------------------------------------------------------------------------------------|-----------------|-----------------------|----------|
| 04   | 1                            | Participant admitted as had been difficult to rouse and was not taking food or fluids                   | Hospitalisation | No                    | Unknown  |
| 04   | 2                            | Seizures at respite care, rescue medication administered, further seizures and raised temperature       | Hospitalisation | No                    | Resolved |
| 04   | 2                            | Cluster of seizures                                                                                     | Hospitalisation | No                    | Resolved |
| 04   | 3                            | Unwitnessed seizure/fall                                                                                | Hospitalisation | No                    | Resolved |
| 05   | 5                            | Previously diagnosed with malignant tumour. Epilepsy relapsed as could not tolerate medication          | Hospitalisation | No                    | Unknown  |
| 05   | 5                            | Inoperable abdominal tumour                                                                             | Other           | No                    | Unknown  |
| 05   | 5                            | Patient had a terminal illness                                                                          | Death           | No                    | Death    |
| 05   | 22                           | Prolonged seizures that required hospitalisation to stabilise                                           | Hospitalisation | No                    | Resolved |
| 06   | 5                            | Routine change of baclofen, no complications                                                            | Hospitalisation | No                    | Resolved |
| 06   | 5                            | High temperature with possible underlying renal infection                                               | Hospitalisation | No                    | Resolved |
| 06   | 11                           | Admitted to hospital because of breathing difficulties arising from chest infection                     | Hospitalisation | No                    | Resolved |
| 07   | 19                           | Mini stroke                                                                                             | Hospitalisation | No                    | Resolved |
| 07   | 19                           | Participant fell and hit head. Admitted but no cause found                                              | Hospitalisation | No                    | Unknown  |
| 07   | 19                           | Participant fell and hit head. Admitted but no cause found                                              | Hospitalisation | No                    | Unknown  |
| 07   | 19                           | Participant fell downstairs while carrying a bag of rubbish and sustained small fracture to the skull   | Hospitalisation | No                    | Unknown  |
| 08   | 13                           | Death from natural causes: aspiration of blood following bleeding oesophagitis                          | Death           | Yes                   | Death    |
| 08   | 14                           | Seizures continued after administration of rescue medication                                            | Hospitalisation | No                    | Resolved |
| 08   | 14                           | Seizures continued after administration of rescue medication                                            | Hospitalisation | No                    | Resolved |
| 08   | 16                           | Admitted for low pulse rate and hypertension; treated for infection                                     | Hospitalisation | No                    | Unknown  |
| 08   | 16                           | Treated for infection                                                                                   | Hospitalisation | No                    | Resolved |
| 08   | 16                           | Hospitalisation for re-siting of percutaneous endoscopic gastrostomy tube                               | Hospitalisation | No                    | Resolved |
| 08   | 16                           | Admitted for treatment of chest infection                                                               | Hospitalisation | No                    | Resolved |
| 08   | 17                           | Admitted for further administration of rescue medication                                                | Hospitalisation | No                    | Unknown  |
| 08   | 17                           | Admitted for administration of further rescue medication to control seizures                            | Hospitalisation | No                    | Resolved |
| 09   | 1                            | Admitted to hospital following blood test. Patient aspirated, resulting in pneumonia and collapsed lung | Death           | No                    | Death    |

continued

TABLE 32 Complete list of SAEs reported (continued)

| Site | Person identification number | SAE                                                                                                                   | Consequence     | Caused by EpAID trial               | Outcome  |
|------|------------------------------|-----------------------------------------------------------------------------------------------------------------------|-----------------|-------------------------------------|----------|
| 09   | 2                            | Fell during seizure, sustained a broken leg in two places                                                             | Hospitalisation | No                                  | Unknown  |
| 09   | 5                            | In hospital since November 2015, death from respiratory causes                                                        | Death           | No                                  | Death    |
| 09   | 5                            | Feeding tube dislodged, pneumonia delayed surgical re-implantation                                                    | Other           | No                                  | Ongoing  |
| 09   | 9                            | Admitted to hospital because of prolonged clonic seizures                                                             | Hospitalisation | No                                  | Unknown  |
| 09   | 9                            | Long clonic seizure, GP thought patient was dehydrated                                                                | Hospitalisation | No                                  | Resolved |
| 09   | 14                           | Hospitalisation after seizure during which the participant fell to the floor and broke an ankle                       | Hospitalisation | No                                  | Unknown  |
| 09   | 20                           | Lump in breast                                                                                                        | Other           | No                                  | Unknown  |
| 11   | 5                            | Multiple infections, acute bronchiolitis, enterocolitis ( <i>Clostridium difficile</i> ), urinary tract infection     | Hospitalisation | No                                  | Ongoing  |
| 11   | 5                            | Attended A&E for low oxygen saturation. Suffered respiratory arrest                                                   | Death           | No                                  | Death    |
| 11   | 10                           | Head injury following a fall after a seizure                                                                          | Hospitalisation | No                                  | Resolved |
| 13   | 13                           | Admitted because of epilepsy episode but diagnosed with a chest infection                                             | Hospitalisation | No                                  | Resolved |
| 15   | 29                           | 18 seizures in 24 hours, which did not respond to rescue medication                                                   | Hospitalisation | No                                  | Resolved |
| 15   | 29                           | Assumed post-ictal state                                                                                              | Hospitalisation | No                                  | Resolved |
| 16   | 5                            | Multiple seizures, chest infection, constipation                                                                      | Hospitalisation | Response not provided by respondent | Ongoing  |
| 16   | 5                            | Continuation of condition                                                                                             | Hospitalisation | Response not provided by respondent | Ongoing  |
| 16   | 5                            | Increase in seizures, bowel perforation                                                                               | Hospitalisation | Response not provided by respondent | Ongoing  |
| 16   | 12                           | Participant died in her sleep of a heart attack                                                                       | Death           | Response not provided by respondent | Death    |
| 16   | 16                           | Diagnosis of community-acquired pneumonia – CURB-65 pneumonia severity score of 2, chronic type 2 respiratory failure | Hospitalisation | No                                  | Resolved |
| 16   | 16                           | Admitted to hospital because of a cough. Diagnosis was community-acquired pneumonia                                   | Hospitalisation | Response not provided by respondent | Ongoing  |
| 16   | 16                           | Admitted to hospital with a chest infection. Died of pneumonia                                                        | Death           | Response not provided by respondent | Death    |
| 17   | 12                           | Participant attended A&E because of uncontrollable pain. Changes made to insulin medication                           | Hospitalisation | No                                  | Ongoing  |

CURB-65, confusion, uraemia, respiratory rate, blood pressure, age  $\geq$  65 years.

## Appendix 4 Scoring instructions for the Epilepsy and Learning Disabilities Quality of Life questionnaire

### Scoring instructions for the 4 subscales of the re-validated version of ELDQOL

#### **A. Seizure Severity Scale** (Qs. 1 – 14)

Qs. 1, 5, 7, 8, 9, 10, 11, 13

Reverse the individual item scoring so that

$$1 = 4$$

$$2 = 3$$

$$3 = 2$$

$$4 = 1$$

5 - define as a missing value so that it is not included in the calculation of the scale score

Qs. 4, 12

Reverse the individual item scoring so that

$$1 = 4$$

$$2 = 3$$

$$3 = 2$$

$$4 = 1$$

$$5 = 0$$

6 - define as a missing value

Qs. 2, 14

5 - Define 5 as a missing value.  
Other scores unchanged.

Qs. 3, 6

$$5 = 0$$

Define 6 as a missing value.

Other scores unchanged

Total scale score range = 10-56

#### **B. Side-effects Profile** (Qs. 17 & 18) (Only items in Q.18 used to compute sub-scale.)

Reverse the individual scoring of each of the 19 items in Q.18 so that:

$$1 = 4$$

$$2 = 3$$

3 = 2  
 4 = 1  
 5 - define as a missing value

Any additional problems itemised by respondents should be recorded, but are not added to the total scale score.

Total scale score range = 19-76

### **C. Behaviour** (Qs. 19 – 27)

Qs.19, 24, 25, 26

Define 5 as a missing value  
 Other scores unchanged

Qs. 20, 21, 27

Reverse scoring so that:

1 = 4  
 2 = 3  
 3 = 2  
 4 = 1  
 5 - define as a missing value

Qs.22, 23

Recode so that:

5 = 4  
 6 – define as a missing value  
 Other scores unchanged

Total scale score range = 9-36

### **D. Mood Scale** (Q. 28)

Reverse scoring of negative items (aggressive, irritable, tearful, hyperactive, sad, agitated, restless, tantrum-prone, frustrated, withdrawn), so that:

1 = 4  
 2 = 3  
 3 = 2  
 4 = 1  
 5 - define as a missing value

Total Scale score range = 16-64

## Appendix 5 Missing data

**TABLE 33** Epilepsy and Learning Disabilities Quality of Life SSS missingness

| Baseline              | Follow-up             | Treatment arm |      |        |      | Overall |      |
|-----------------------|-----------------------|---------------|------|--------|------|---------|------|
|                       |                       | Active        |      | TAU    |      | n/N     | %    |
|                       |                       | n/N           | %    | n/N    | %    | n/N     | %    |
| Present               | Present               | 100/184       | 54.3 | 72/128 | 56.3 | 172/312 | 55.1 |
| Present               | No seizures (4 weeks) | 26/184        | 14.1 | 16/128 | 12.5 | 42/312  | 13.5 |
| Present               | Missing               | 10/184        | 5.4  | 14/128 | 10.9 | 24/312  | 7.7  |
| < 50% answered        | No seizures (4 weeks) | 1/184         | 0.5  | 1/128  | 0.8  | 2/312   | 0.6  |
| < 50% answered        | Missing               | 0/184         | 0.0  | 1/128  | 0.8  | 1/312   | 0.3  |
| No seizures (4 weeks) | Present               | 13/184        | 7.1  | 10/128 | 7.8  | 23/312  | 7.4  |
| No seizures (4 weeks) | No seizures (4 weeks) | 21/184        | 11.4 | 11/128 | 8.6  | 32/312  | 10.3 |
| No seizures (4 weeks) | Missing               | 6/184         | 3.3  | 0/128  | 0.0  | 6/312   | 1.9  |
| Missing               | Present               | 0/184         | 0.0  | 1/128  | 0.8  | 1/312   | 0.3  |
| Missing               | Missing               | 7/184         | 3.8  | 2/128  | 1.6  | 9/312   | 2.9  |

**TABLE 34** Epilepsy and Learning Disabilities Quality of Life AED side effects missingness

| Baseline              | Follow-up             | Treatment arm |      |        |      | Overall |      |
|-----------------------|-----------------------|---------------|------|--------|------|---------|------|
|                       |                       | Active        |      | TAU    |      | n/N     | %    |
|                       |                       | n/N           | %    | n/N    | %    | n/N     | %    |
| Present               | Present               | 82/184        | 44.6 | 62/128 | 48.4 | 144/312 | 46.2 |
| Present               | < 50% answered        | 5/184         | 2.7  | 3/128  | 2.3  | 8/312   | 2.6  |
| Present               | No seizures (4 weeks) | 18/184        | 9.8  | 17/128 | 13.3 | 35/312  | 11.2 |
| Present               | Missing               | 9/184         | 4.9  | 14/128 | 10.9 | 23/312  | 7.4  |
| < 50% answered        | Present               | 7/184         | 3.8  | 4/128  | 3.1  | 11/312  | 3.5  |
| < 50% answered        | < 50% answered        | 6/184         | 3.3  | 3/128  | 2.3  | 9/312   | 2.9  |
| < 50% answered        | No seizures (4 weeks) | 9/184         | 4.9  | 0/128  | 0.0  | 9/312   | 2.9  |
| < 50% answered        | Missing               | 1/184         | 0.5  | 1/128  | 0.8  | 2/312   | 0.6  |
| No seizures (4 weeks) | Present               | 10/184        | 5.4  | 10/128 | 7.8  | 20/312  | 6.4  |
| No seizures (4 weeks) | < 50% answered        | 3/184         | 1.6  | 0/128  | 0.0  | 3/312   | 1.0  |
| No seizures (4 weeks) | No seizures (4 weeks) | 21/184        | 11.4 | 11/128 | 8.6  | 32/312  | 10.3 |
| No seizures (4 weeks) | Missing               | 6/184         | 3.3  | 0/128  | 0.0  | 6/312   | 1.9  |
| Missing               | Present               | 0/184         | 0.0  | 1/128  | 0.8  | 1/312   | 0.3  |
| Missing               | Missing               | 7/184         | 3.8  | 2/128  | 1.6  | 9/312   | 2.9  |

**TABLE 35** Epilepsy and Learning Disabilities Quality of Life behaviour missingness

| Baseline              | Follow-up             | Treatment arm |      |        |      | Overall |      |
|-----------------------|-----------------------|---------------|------|--------|------|---------|------|
|                       |                       | Active        |      | TAU    |      |         |      |
|                       |                       | n/N           | %    | n/N    | %    | n/N     | %    |
| Present               | Present               | 99/184        | 53.8 | 71/128 | 55.5 | 170/312 | 54.5 |
| Present               | < 50% answered        | 0/184         | 0.0  | 1/128  | 0.8  | 1/312   | 0.3  |
| Present               | No seizures (4 weeks) | 27/184        | 14.7 | 17/128 | 13.3 | 44/312  | 14.1 |
| Present               | Missing               | 10/184        | 5.4  | 15/128 | 11.7 | 25/312  | 8.0  |
| < 50% answered        | Present               | 1/184         | 0.5  | 0/128  | 0.0  | 1/312   | 0.3  |
| No seizures (4 weeks) | Present               | 13/184        | 7.1  | 10/128 | 7.8  | 23/312  | 7.4  |
| No seizures (4 weeks) | No seizures (4 weeks) | 21/184        | 11.4 | 11/128 | 8.6  | 32/312  | 10.3 |
| No seizures (4 weeks) | Missing               | 6/184         | 3.3  | 0/128  | 0.0  | 6/312   | 1.9  |
| Missing               | Present               | 0/184         | 0.0  | 1/128  | 0.8  | 1/312   | 0.3  |
| Missing               | Missing               | 7/184         | 3.8  | 2/128  | 1.6  | 9/312   | 2.9  |

**TABLE 36** Epilepsy and Learning Disabilities Quality of Life mood missingness

| Baseline              | Follow-up             | Treatment arm |      |        |      | Overall |      |
|-----------------------|-----------------------|---------------|------|--------|------|---------|------|
|                       |                       | Active        |      | TAU    |      |         |      |
|                       |                       | n/N           | %    | n/N    | %    | n/N     | %    |
| Present               | Present               | 97/184        | 52.7 | 72/128 | 56.3 | 169/312 | 54.2 |
| Present               | < 50% answered        | 1/184         | 0.5  | 0/128  | 0.0  | 1/312   | 0.3  |
| Present               | No seizures (4 weeks) | 27/184        | 14.7 | 17/128 | 13.3 | 44/312  | 14.1 |
| Present               | Missing               | 10/184        | 5.4  | 15/128 | 11.7 | 25/312  | 8.0  |
| < 50% answered        | Present               | 1/184         | 0.5  | 0/128  | 0.0  | 1/312   | 0.3  |
| < 50% answered        | < 50% answered        | 1/184         | 0.5  | 0/128  | 0.0  | 1/312   | 0.3  |
| No seizures (4 weeks) | Present               | 11/184        | 6.0  | 10/128 | 7.8  | 21/312  | 6.7  |
| No seizures (4 weeks) | < 50% answered        | 2/184         | 1.1  | 0/128  | 0.0  | 2/312   | 0.6  |
| No seizures (4 weeks) | No seizures (4 weeks) | 21/184        | 11.4 | 11/128 | 8.6  | 32/312  | 10.3 |
| No seizures (4 weeks) | Missing               | 6/184         | 3.3  | 0/128  | 0.0  | 6/312   | 1.9  |
| Missing               | Present               | 0/184         | 0.0  | 1/128  | 0.8  | 1/312   | 0.3  |
| Missing               | Missing               | 7/184         | 3.8  | 2/128  | 1.6  | 9/312   | 2.9  |

**TABLE 37** Tonic-clonic seizures missingness

| Baseline | Follow-up | Treatment arm |      |        |      |         |      |
|----------|-----------|---------------|------|--------|------|---------|------|
|          |           | Active        |      | TAU    |      | Overall |      |
|          |           | n/N           | %    | n/N    | %    | n/N     | %    |
| Present  | Present   | 153/184       | 83.2 | 98/128 | 76.6 | 251/312 | 80.4 |
| Present  | Missing   | 20/184        | 10.9 | 20/128 | 15.6 | 40/312  | 12.8 |
| Missing  | Present   | 3/184         | 1.6  | 2/128  | 1.6  | 5/312   | 1.6  |
| Missing  | Missing   | 8/184         | 4.3  | 8/128  | 6.3  | 16/312  | 5.1  |

**TABLE 38** Modified Carer Strain Index missingness

| Baseline | Follow-up | Treatment arm |      |        |      |         |      |
|----------|-----------|---------------|------|--------|------|---------|------|
|          |           | Active        |      | TAU    |      | Overall |      |
|          |           | n/N           | %    | n/N    | %    | n/N     | %    |
| Present  | Present   | 37/165        | 22.4 | 30/118 | 25.4 | 67/283  | 23.7 |
| Present  | Missing   | 12/165        | 7.3  | 19/118 | 16.1 | 31/283  | 11.0 |
| Missing  | Present   | 0/165         | 0.0  | 2/118  | 1.7  | 2/283   | 0.7  |
| Missing  | Missing   | 116/165       | 70.3 | 67/118 | 56.8 | 183/283 | 64.7 |

**TABLE 39** Covariate missingness

| Variable                        | Treatment arm |     |        |      |         |      |
|---------------------------------|---------------|-----|--------|------|---------|------|
|                                 | Active        |     | TAU    |      | Overall |      |
|                                 | n/N           | %   | n/N    | %    | n/N     | %    |
| Age                             | 7/184         | 3.8 | 2/128  | 1.6  | 9/312   | 2.9  |
| Accommodation                   | 7/184         | 3.8 | 6/128  | 4.7  | 13/312  | 4.2  |
| Level of ID                     | 11/184        | 6.0 | 21/128 | 16.4 | 32/312  | 10.3 |
| Deprivation Index               | 5/184         | 2.7 | 2/128  | 1.6  | 7/312   | 2.2  |
| Number of tonic-clonic seizures | 11/184        | 6.0 | 10/128 | 7.8  | 21/312  | 6.7  |





# Appendix 6 Community intellectual disability team epilepsy service availability questionnaire version 1

EpAID epilepsy clinical ID questionnaire version 1.0 21 Oct 2014

ISRCTN96895428

Page 1

1. What catchment area does your service look after?

\_\_\_\_\_

2. Approximately how many adults are looked after within your service?

\_\_\_\_\_

3. Approximately how many adults have a diagnosis of epilepsy within your service?

Number \_\_\_\_\_ Not sure

4. Does your service maintain an updated epilepsy register? Yes / No

5. Does your service run an epilepsy clinic? Yes / No

If yes, what does it consist of?

\_\_\_\_\_  
—

6. Does the LD Consultant in your team have a particular interest in epilepsy? Yes / No

**COMMUNITY INTELLECTUAL DISABILITY EPILEPSY**

**SERVICE AVAILABILITY QUESTIONNAIRE**

**Name of the Community Learning**

**(Intellectual) Disability Team:**

\_\_\_\_\_

**Address:** \_\_\_\_\_

\_\_\_\_\_

\_\_\_\_\_

**Date:** \_\_\_\_ / \_\_\_\_ / \_\_\_\_

**7. Relevant LD Team members How many?**

Consultant Psychiatrists.....

Non-consultant doctors.....

Community LD nurses.....

Epilepsy Nurse Specialists (ENS) .....

LD Nurses with a specialist interest in epilepsy.....

**8. In general, what role does the ENS/LD nurse have in the management of someone's epilepsy?**

*Please tick all that are relevant*

Initial assessment.....

Ongoing follow-up.....

Training/care plan writing for emergency medication.....

Telephone contact to support and advise families.....

Visits to support and advise families.....

Liaison with other services.....

Other \_\_\_\_\_

**8. If there are no ENS's in your team do you have access to neurology or general hospital-based**

**Epilepsy Nurse Specialists?**

Yes / No

If yes, what sort of access?

\_\_\_\_\_

**9. Does your LD service have direct access to epilepsy investigations, for example EEG and brain scans? Yes / No****10. Does your service provide training to carers about the emergency treatment of prolonged seizures? Yes / No**

*Please continue overleaf*

---



---

EpAID epilepsy clinical ID questionnaire version 1.0 21 Oct 2014

ISRCTN96895428 Page 2

**11. Is the local learning disability service the main provider of epilepsy care to *any* of your patients?**

Yes / No

If yes, please estimate the percentage of patients where this is the case: \_\_\_\_\_%

**12. Is the local neurology service the main provider of epilepsy care to *any* of your patients?**

Yes / No

If yes, please estimate the percentage of patients where this is the case: \_\_\_\_\_%

**What are the referral criteria for neurology services?**

All patients with LD and epilepsy.....

Those with the most difficult to treat epilepsy.....

Other: \_\_\_\_\_

**13. Is there a shared management approach between neurology and LD services for any of your patients that involves joint discussions about management?**

Yes / No

If yes, please estimate the percentage of patients for whom this is the case: \_\_\_\_\_%

**14. Does your learning disability service play a role in diagnosing new cases of epilepsy?**

Yes / No

If yes, please give details:

---



---

**15. Please list any other services that you liaise with regarding epilepsy care. For example, voluntary organisations, private health providers, specialist epilepsy centres (e.g. David Lewis Centre, Chalfont).**

---



---

**16. Does your service follow any sort of epilepsy care pathway that makes explicit reference to people with LD? Yes / No**

**If yes, is this pathway used for diagnosis or continuing treatment? Diagnosis / Treatment / Both**

**Who was responsible for its design? Your local team / PCT / SHA**

**17. Are there any plans to change or restructure the epilepsy services that you provide?**

**Yes / No**

**If yes, please give details:**

---

—

**18. Please add any other comments you would like to make about the epilepsy services provided by your team.**

**Thank you for completing this questionnaire.**

**Developed by members of the CIDDRG. University of Cambridge, UK**

**We may wish to discuss your responses to the questionnaire. If this is acceptable, please would you provide your contact details:**

**Name:\_\_\_\_\_ Contact email/telephone**

**no.:\_\_\_\_\_**



A decorative graphic consisting of numerous thin, parallel green lines that curve from the left side of the page towards the right, creating a sense of movement and depth.

**EME  
HS&DR  
HTA  
PGfAR  
PHR**

Part of the NIHR Journals Library  
[www.journalslibrary.nihr.ac.uk](http://www.journalslibrary.nihr.ac.uk)

*This report presents independent research funded by the National Institute for Health Research (NIHR). The views expressed are those of the author(s) and not necessarily those of the NHS, the NIHR or the Department of Health*

***Published by the NIHR Journals Library***
